# Supplementary material for: Synthesis, Biological Evaluation, and QSAR Studies of 3-Iodochromone Derivatives as Potential Fungicides
Source: Front Chem. 2021 Apr 30;9:636882. doi: 10.3389/fchem.2021.636882 (PMC8120269; doi:10.3389/fchem.2021.636882)
Supplement: Supplementary file 1 [file DataSheet1.docx]

**Synthesis, biological evaluation and QSAR studies of 3-Iodochromone derivatives as potential fungicides**

Parshant Kaushik1, *, Najam A. Shakil1 and Virendra S. Rana1

*1Division of Agricultural Chemicals, ICAR-Indian Agricultural Research Institute, New Delhi, India*

*Correspondence:parshantagrico@gmail.com, parshant.kaushik@icar.gov.in

**Supporting Information**

**Figure 1:** 1H NMR spectrum of compound **4b**

**Figure 2:** 13C NMR spectrum of compound **4b**

**Figure 3:**1HNMR spectrum of compound **4n**

**Figure 4:** 13C NMR spectrum of compound **4n**

**Figure 5:** 1H NMR spectrum of compound **4r**

**Figure 6:** 13C NMR spectrum of compound **4r**


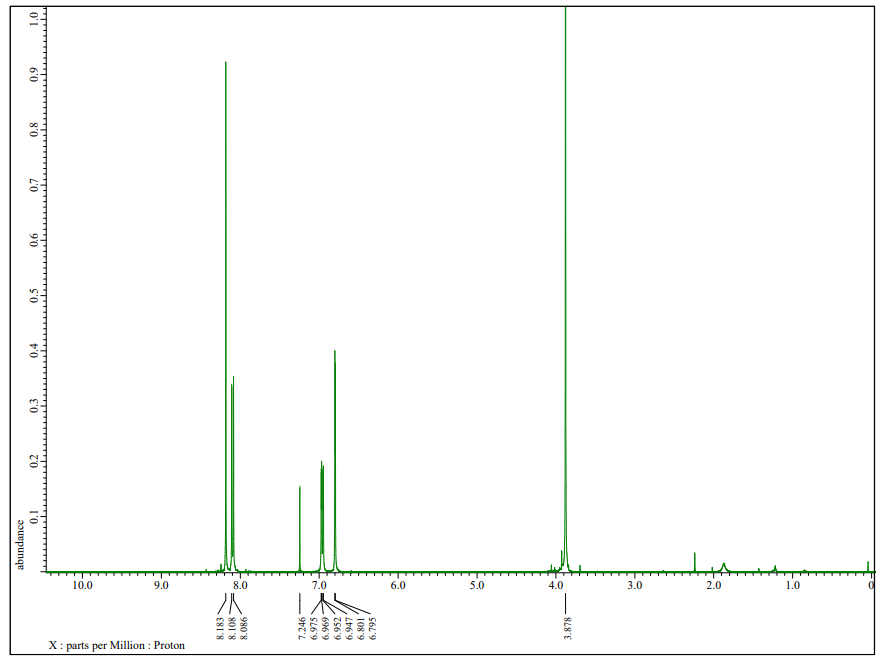


**Figure 1:** 1H NMR (400 MHz, CDCl3)of compound **4b**


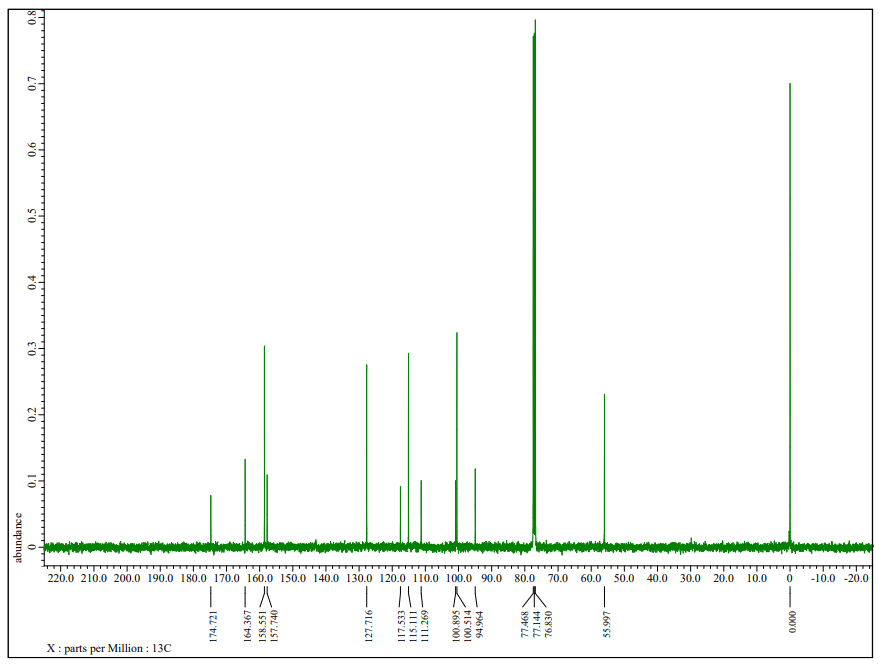


**Figure 2**: 13C NMR (100.6 MHz, CDCl3)of compound **4b**


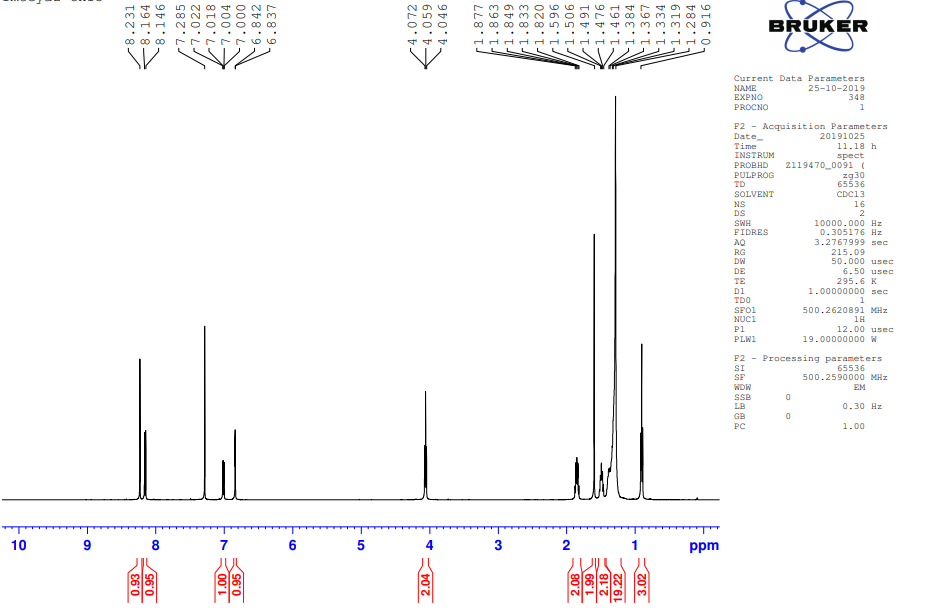


**Figure 3**: 1H NMR (400 MHz, CDCl3)of compound **4n**


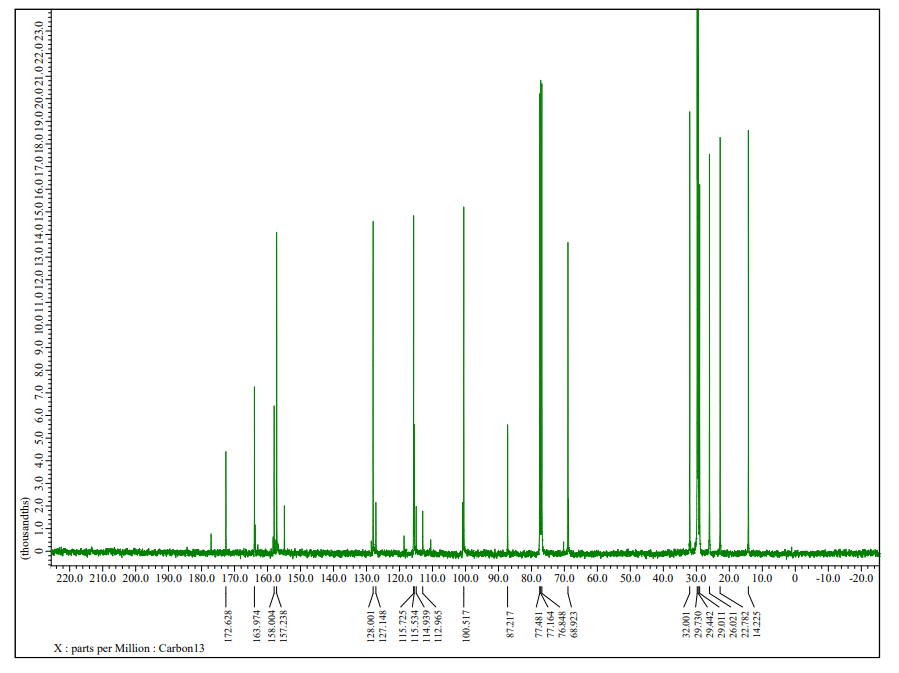


**Figure 4**: 13C NMR (100.6 MHz, CDCl3)of compound **4n**


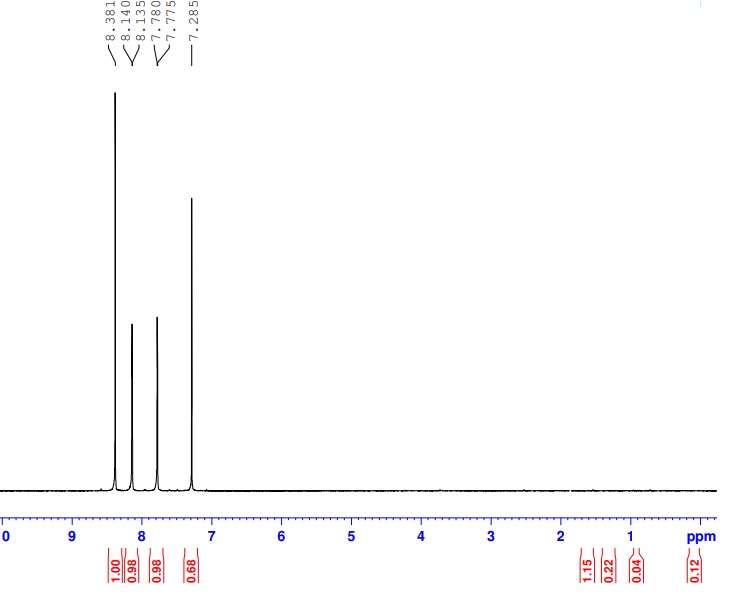


**Figure 5**: 1H NMR (400 MHz, CDCl3)of compound **4r**


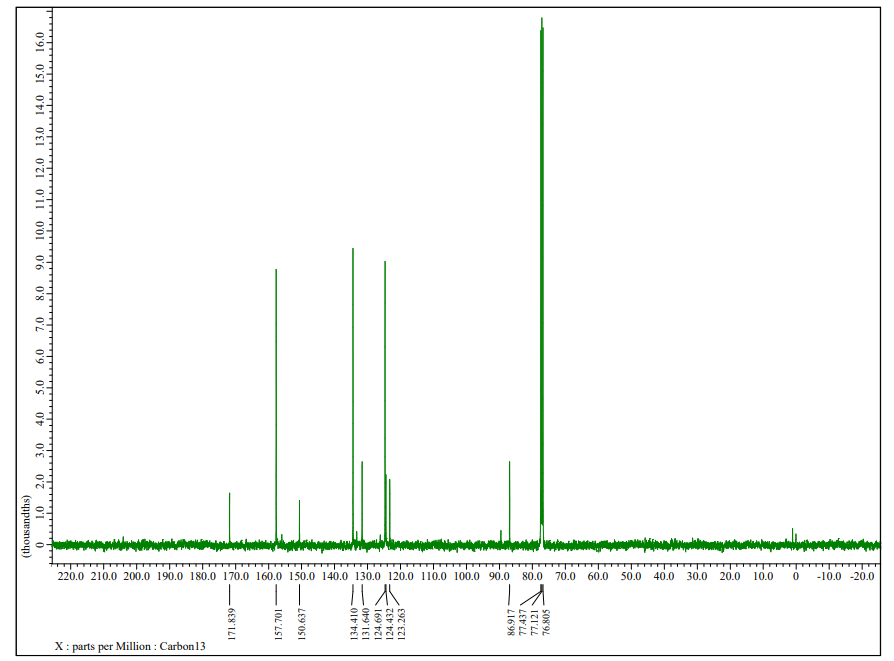


**Figure 4**: 13C NMR (100.6 MHz, CDCl3)of compound **4r**
